# Supplementary material for: Traditional knowledge of wild edible plants used in the northwest of the Iberian Peninsula (Spain and Portugal): a comparative study
Source: PubMed Central journal article supplement (PMC1904191; doi:10.1186/1746-4269-3-27), 2007-06-07
Supplement: 1746-4269-3-27-S1.pdf [file 1746-4269-3-27-S1.pdf]

**Additional file 1.** Wild food plants traditionally consumed and number of informants that mention each food-use in the survey areas. SAN: Sanabria; CAU: Caurel; PIL: Piloña; PIC: Picos de Europa; CPO: Campoo; MON: Montesinho. Present but not mentioned in the area (●), absent (-).

| Family/Species                                                                                                                                           | SAN | CAU | PIL | PIC | CPO | MON | Food use-categor    | Part used, way of consumption                                       |
|----------------------------------------------------------------------------------------------------------------------------------------------------------|-----|-----|-----|-----|-----|-----|---------------------|---------------------------------------------------------------------|
| APIACEAE                                                                                                                                                 |     |     |     |     |     |     |                     |                                                                     |
| <i>Apium nodiflorum</i> (L.) Lag.                                                                                                                        | 2   | ●   | 3   | ●   | -   | ●   | Vegetables          | Tender leaves and stems, raw in salads                              |
| <i>Conopodium</i> sp. pl. ( <i>C. majus</i> (Gouan) Loret, <i>C. pyrenaicum</i> (Loisel.) Miégev., <i>C. subcarneum</i> (Boiss. & Reut.) Boiss. & Reut.) | ●   | 4   | ●   | 1   | 9   | 5   | Subterranean organs | Tubers, raw as a snack                                              |
| <i>Foeniculum vulgare</i> Mill.                                                                                                                          | 3   | 3   | 1   | 2   | ●   | 10  | Liqueurs            | Aerial part or seeds for liqueurs                                   |
|                                                                                                                                                          | ●   | ●   | ●   | 1   | 1   | ●   | Vegetables          | Tender leaves and stems, raw in salads or stewed                    |
|                                                                                                                                                          | ●   | ●   | ●   | ●   | ●   | 32  | Seasoning           | Seeds for seasoning soups and stews                                 |
|                                                                                                                                                          | ●   | ●   | ●   | 2   | ●   | 23  | Herbal teas         | Aerial part or seeds for herbal teas                                |
| <i>Physospermum cornubiense</i> (L.) DC.                                                                                                                 | -   | ●   | ●   | -   | ●   | 3   | Seasoning           | Fruits, for flavouring different sorts of cakes made with chestnuts |
|                                                                                                                                                          | -   | ●   | ●   | -   | ●   | 2   | Liqueurs            | Tender stems for liqueurs                                           |
|                                                                                                                                                          | -   | ●   | ●   | -   | ●   | 3   | Herbal teas         | leaves for herbal teas                                              |
| <i>Scandix australis</i> L.                                                                                                                              | -   | -   | -   | -   | 4   | -   | Vegetables          | Tender leaves and stems, raw as a snack                             |
|                                                                                                                                                          | -   | -   | -   | -   | 2   | -   | Liqueurs            | Tender leaves and stems for liqueurs                                |
| ASTERACEAE                                                                                                                                               |     |     |     |     |     |     |                     |                                                                     |
| <i>Achillea millefolium</i> L.                                                                                                                           | ●   | ●   | 1   | 6   | 3   | 2   | Herbal teas         | Inflorescences, as herbal tea                                       |
| <i>Chamaemelum nobile</i> (L.) All.                                                                                                                      | 4   | 6   | 26  | 34  | 17  | 13  | Herbal teas         | Inflorescences, as herbal tea                                       |
|                                                                                                                                                          | ●   | ●   | ●   | 1   | ●   | ●   | Liqueurs            | Inflorescences for liqueurs                                         |
| <i>Helichrysum stoechas</i> (L.) Moench                                                                                                                  | -   | -   | -   | ●   | 5   | ●   | Herbal teas         | Inflorescences, as herbal tea                                       |
| <i>Hypochoeris radicata</i> L.                                                                                                                           | ●   | ●   | ●   | ●   | 2   | ●   | Vegetables          | Basal leaves, raw as a snack                                        |
| <i>Matricaria discoidea</i> DC.                                                                                                                          | ●   | ●   | ●   | ●   | ●   | 8   | Herbal teas         | Inflorescences, as herbal tea                                       |
| <i>Taraxacum officinale</i> Weber                                                                                                                        | ●   | ●   | ●   | 2   | 5   | ●   | Vegetables          | Basal leaves, raw as a snack                                        |
| <i>Tragopogon pratensis</i> L.                                                                                                                           | ●   | ●   | ●   | ●   | 9   | -   | Vegetables          | Tender leaves and stems, raw as a snack                             |
| BERBERIDACEAE                                                                                                                                            |     |     |     |     |     |     |                     |                                                                     |
| <i>Berberis vulgaris</i> L.                                                                                                                              | ●   | ●   | ●   | 3   | ●   | -   | Vegetables          | Tender leaves, raw as a snack                                       |
| BETULACEAE                                                                                                                                               |     |     |     |     |     |     |                     |                                                                     |
| <i>Corylus avellana</i> L.                                                                                                                               | 2   | 13  | 10  | 34  | 13  | 3   | Fruits              | Fruits, eaten raw, dried, added to cakes                            |
| BORAGINACEAE                                                                                                                                             |     |     |     |     |     |     |                     |                                                                     |

|                                                                    |   |   |   |    |    |    |                     |                                                              |
|--------------------------------------------------------------------|---|---|---|----|----|----|---------------------|--------------------------------------------------------------|
| <i>Borago officinalis</i> L.                                       | • | – | • | 1  | 1  | 22 | Vegetables          | Basal leaves, stewed                                         |
| <i>Lithospermum officinale</i> L.                                  | – | – | • | •  | 4  | •  | Herbal teas         | Aerial part for herbal teas                                  |
| BRASSICACEAE                                                       |   |   |   |    |    |    |                     |                                                              |
| <i>Rorippa nasturtium-aquaticum</i> (L.) Hayek                     | 6 | 3 | 1 | •  | 11 | 28 | Vegetables          | Tender leaves and stems; raw in salads or stewed in soups    |
| <i>Sinapis arvensis</i> L.                                         | • | • | • | •  | –  | 2  | Seasoning           | Seeds milled as a condiment                                  |
| CANNABACEAE                                                        |   |   |   |    |    |    |                     |                                                              |
| <i>Humulus lupulus</i> L.                                          | – | • | • | –  | •  | 9  | Liqueurs            | Immature female inflorescences for making liqueurs           |
| CAPRIFOLIACEAE                                                     |   |   |   |    |    |    |                     |                                                              |
| <i>Sambucus nigra</i> L.                                           | • | • | 1 | 5  | 6  | 3  | Fruits              | Fruits, for making jams or syrups                            |
|                                                                    | • | • | • | 1  | •  | 3  | Liqueurs            | Fruits, for making liqueurs                                  |
| <i>Viburnum lantana</i> L.                                         | – | – | • | –  | 13 | –  | Fruits              | Fruits, eaten raw as snack, or stored wrapped in straw       |
| CARYOPHYLLACEAE                                                    |   |   |   |    |    |    |                     |                                                              |
| <i>Silene vulgaris</i> (Moench) Garcke                             | • | • | • | 1  | 1  | •  | Vegetables          | Leaves and young stems, stewed in omelettes and other dishes |
| CHENOPODIACEAE                                                     |   |   |   |    |    |    |                     |                                                              |
| <i>Chenopodium murale</i> L.                                       | • | – | – | –  | –  | 2  | Vegetables          | Leaves, stewed in soups                                      |
| CISTACEAE                                                          |   |   |   |    |    |    |                     |                                                              |
| <i>Halimium lasianthum</i> subsp. <i>alyssoides</i> (Lam.) Greuter | – | – | – | –  | –  | 3  | Vegetables          | Young floral buds and immature fruits, chewed raw as a snack |
| CUCURBITACEAE                                                      |   |   |   |    |    |    |                     |                                                              |
| <i>Bryonia dioica</i> Jacq.                                        | • | • | • | •  | •  | 37 | Vegetables          | Young shoots with leaves, stewed                             |
| CUPRESSACEAE                                                       |   |   |   |    |    |    |                     |                                                              |
| <i>Juniperus communis</i> subsp. <i>alpina</i> (Suter) Čelak       | 4 | • | • | •  | •  | –  | Liqueurs            | Fruits, for making liqueurs                                  |
| ERICACEAE                                                          |   |   |   |    |    |    |                     |                                                              |
| <i>Arbutus unedo</i> L.                                            | • | 2 | 4 | 26 | –  | •  | Fruits              | Fruits, eaten raw                                            |
|                                                                    | • | • | 2 | 1  | –  | 15 | Liqueurs            | Fruits for making liqueurs                                   |
| <i>Arctostaphylos uva-ursi</i> (L.) Spreng.                        | – | – | – | 7  | 5  | –  | Fruits              | Fruits, eaten raw as snack                                   |
| <i>Vaccinium myrtillus</i> L.                                      | 4 | • | 6 | 22 | 18 | –  | Fruits              | Fruits, eaten raw and for making jam                         |
|                                                                    | 1 | 5 | • | 6  | •  | –  | Liqueurs            | Fruits, for making liqueurs                                  |
| FABACEAE                                                           |   |   |   |    |    |    |                     |                                                              |
| <i>Pterospartum tridentatum</i> (L.) Willk.                        | • | • | • | •  | •  | 21 | Seasoning           | Inflorescences, as a condiment for chicken and rabbit meat   |
|                                                                    | • | • | • | •  | •  | 6  | Vegetables          | Young shoots, stewed with rice                               |
|                                                                    | • | • | 1 | •  | •  | 10 | Herbal teas         | Flowered aerial part as herbal tea                           |
| <i>Trifolium alpinum</i> L.                                        | 1 | – | – | 8  | 3  | –  | Subterranean organs | Roots, chewed and sucked                                     |
| <i>Trifolium pratense</i> L.                                       | • | • | • | 2  | 1  | •  | Flowers             | Flowers sucked                                               |
| FAGACEAE                                                           |   |   |   |    |    |    |                     |                                                              |

|                                                              |    |    |    |    |    |    |                     |                                                                                                                |
|--------------------------------------------------------------|----|----|----|----|----|----|---------------------|----------------------------------------------------------------------------------------------------------------|
| <i>Castanea sativa</i> Mill.                                 | 12 | 12 | 31 | 19 | 5  | 43 | Fruits              | Fruits, eaten raw, dried, roasted or added as a condiment for stews, and desserts, sometimes ground into flour |
| <i>Fagus sylvatica</i> L.                                    | -  | 4  | 3  | 4  | 6  | -  | Fruits              | Fruits, eaten raw or for extracting oil                                                                        |
| <i>Quercus ilex</i> L. [subsp. <i>ballota</i> (Desf.) Samp.] | •  | •  | •  | 2  | •  | •  | Fruits              | Fruits, roasted                                                                                                |
| <i>Quercus petraea</i> (Matt.) Liebl.                        | •  | •  | •  | 3  | •  | -  | Fruits              | Fruits, roasted                                                                                                |
| <i>Quercus robur</i> L.                                      | •  | •  | •  | 2  | -  | •  | Fruits              | Fruits, roasted                                                                                                |
| GROSSULARIACEAE                                              |    |    |    |    |    |    |                     |                                                                                                                |
| <i>Ribes alpinum</i> L.                                      | -  | -  | •  | 7  | 14 | -  | Fruits              | Fruits, eaten raw                                                                                              |
| <i>Ribes uva-crispa</i> L.                                   | -  | •  | •  | 1  | 11 | -  | Fruits              | Fruits, eaten raw                                                                                              |
| IRIDACEAE                                                    |    |    |    |    |    |    |                     |                                                                                                                |
| <i>Crocus nudiflorus</i> Sm.                                 | •  | -  | 3  | •  | -  | -  | Subterranean organs | Bulbs, raw as a snack                                                                                          |
| <i>Romulea bulbocodium</i> (L.) Sebast. & Mauri              | •  | •  | •  | 1  | 4  | •  | Subterranean organs | Bulbs, raw as a snack                                                                                          |
| LAMIACEAE                                                    |    |    |    |    |    |    |                     |                                                                                                                |
| <i>Calamintha nepeta</i> (L.) Savi                           | •  | 4  | •  | •  | •  | 17 | Seasoning           | Aerial part, as a condiments for soups and stews                                                               |
|                                                              | •  | •  | •  | •  | •  | 17 | Herbal teas         | Aerial part, as herbal tea                                                                                     |
| <i>Lamium maculatum</i> L.                                   | •  | •  | 1  | 4  | 3  | •  | Flowers             | Flowers sucked                                                                                                 |
| <i>Lamium purpureum</i> L.                                   | •  | •  | •  | •  | •  | 7  | Flowers             | Flowers sucked                                                                                                 |
| <i>Lavandula stoechas</i> L.                                 | •  | -  | -  | •  | •  | 21 | Seasoning           | Aerial part for seasoning rabbit meat                                                                          |
| <i>Mentha aquatica</i> L.                                    | •  | -  | •  | -  | •  | 6  | Herbal teas         | Aerial part, as herbal tea                                                                                     |
| <i>Mentha pulegium</i> L.                                    | 3  | •  | •  | •  | 1  | 6  | Herbal teas         | Inflorescences, as herbal teas                                                                                 |
|                                                              | •  | •  | •  | •  | •  | 4  | Liqueurs            | Inflorescences, for makings liqueurs                                                                           |
|                                                              | •  | •  | •  | •  | •  | 23 | Seasoning           | Aerial part, as a condiment for soups                                                                          |
| <i>Mentha suaveolens</i> Ehrh.                               | •  | •  | •  | •  | •  | 9  | Seasoning           | Aerial part, as a condiment for soups                                                                          |
| <i>Origanum vulgare</i> L.                                   | 8  | 6  | 10 | 12 | 20 | 48 | Seasoning           | Inflorescences, for seasoning pork (black pudding, "chorizo", marinated pork), stews and roasted meat          |
|                                                              | •  | •  | 2  | 3  | 1  | 2  | Herbal teas         | Inflorescences, as herbal tea                                                                                  |
| <i>Salvia sclarea</i> L.                                     | •  | -  | -  | -  | -  | 4  | Seasoning           | Leaves and inflorescences, for seasoning soups                                                                 |
| <i>Sideritis hyssopifolia</i> L.                             | -  | •  | 2  | 45 | 9  | -  | Herbal teas         | Inflorescences, as herbal tea                                                                                  |
|                                                              | -  | •  | •  | 2  | •  | -  | Liqueurs            | Inflorescences for making liqueurs                                                                             |
| <i>Thymus mastichina</i> (L.) L.                             | •  | -  | -  | 1  | 2  | 31 | Seasoning           | Inflorescences, for seasoning                                                                                  |
| <i>Thymus pulegioides</i> L.                                 | 2  | 2  | •  | 6  | 3  | 3  | Herbal teas         | Inflorescences, as herbal tea                                                                                  |
|                                                              | •  | •  | •  | 1  | •  | 2  | Seasoning           | Inflorescences, for seasoning fish and meat stews and "chorizo"                                                |

|                                       |   |   |    |    |    |    |                     |                                                            |
|---------------------------------------|---|---|----|----|----|----|---------------------|------------------------------------------------------------|
| <i>Thymus zygis</i> Loefl. ex L.      | 2 | - | -  | -  | 3  | 12 | Seasoning           | Inflorescences, for seasoning stews and meat               |
| LAURACEAE                             |   |   |    |    |    |    |                     |                                                            |
| <i>Laurus nobilis</i> L.              | 1 | 7 | 7  | 27 | 12 | 45 | Seasoning           | Leaves, for seasoning stews and "chouriço"                 |
| LILIACEAE                             |   |   |    |    |    |    |                     |                                                            |
| <i>Allium</i> spp.                    | • | • | •  | 1  | 1  | •  | Vegetables          | Bulbs, for seasoning stews                                 |
| <i>Fritillaria pyrenaica</i> L.       | • | - | •  | •  | 5  | -  | Flowers             | Flowers sucked                                             |
| <i>Merendera montana</i> (L.) Lange   | 3 | • | 3  | 1  | 1  | •  | Subterranean organs | Tubers, raw as a snack                                     |
| MALVACEAE                             |   |   |    |    |    |    |                     |                                                            |
| <i>Malva sylvestris</i> L.            | • | • | •  | 2  | 2  | 5  | Vegetables          | immature fruits, raw as a snack                            |
| <i>Malva tournefortiana</i> L.        | • | - | -  | -  | -  | 3  | Vegetables          | immature fruits, raw as a snack                            |
| NYMPHAEACEAE                          |   |   |    |    |    |    |                     |                                                            |
| <i>Nymphaea alba</i> L.               | 3 | - | -  | -  | -  | -  | Fruits              | Fruits, eaten raw                                          |
| OXALIDACEAE                           |   |   |    |    |    |    |                     |                                                            |
| <i>Oxalis acetosella</i> L.           | • | - | 7  | 1  | 1  | -  | Vegetables          | Leaves, raw as a snack                                     |
| POLYGONACEAE                          |   |   |    |    |    |    |                     |                                                            |
| <i>Rumex acetosa</i> L.               | 5 | • | 22 | 15 | 35 | 18 | Vegetables          | Basal leaves, raw as a snack, in salads or stewed in soups |
| <i>Rumex acetosella</i> L.            | • | 3 | •  | •  | •  | 10 | Vegetables          | Leaves, raw as a snack and in salads                       |
| <i>Rumex induratus</i> Boiss. & Reut. | • | - | -  | -  | -  | 3  | Vegetables          | Leaves, raw in salads                                      |
| <i>Rumex obtusifolius</i> L.          | • | • | •  | 1  | •  | 1  | Vegetables          | Leaves, stewed                                             |
| <i>Rumex scutatus</i> L.              | - | - | •  | 3  | -  | -  | Vegetables          | Leaves, raw as a snack                                     |
| PORTULACACEAE                         |   |   |    |    |    |    |                     |                                                            |
| <i>Montia fontana</i> L.              | 4 | • | •  | •  | -  | 22 | Vegetables          | Tender leaves and stems, raw in salads                     |
| <i>Portulaca oleracea</i> L.          | • | - | •  | •  | -  | 20 | Vegetables          | Tender leaves and stems, stewed                            |
| PRIMULACEAE                           |   |   |    |    |    |    |                     |                                                            |
| <i>Primula acaulis</i> (L.) L.        | • | 2 | 4  | •  | •  | •  | Flowers             | Flowers sucked                                             |
| <i>Primula elatior</i> (L.) L.        | - | - | -  | •  | 3  | -  | Flowers             | Flowers sucked                                             |
| RAFFLESIAEAE                          |   |   |    |    |    |    |                     |                                                            |
| <i>Cytinus hypocistis</i> (L.) L.     | 5 | • | •  | -  | -  | 3  | Flowers             | Flowers sucked                                             |
| ROSACEAE                              |   |   |    |    |    |    |                     |                                                            |
| <i>Amelanchier ovalis</i> Medik.      | • | - | •  | •  | 2  | •  | Fruits              | Fruits, eaten raw                                          |
| <i>Crataegus monogyna</i> Jacq.       | 4 | • | 1  | 20 | 17 | 3  | Fruits              | Fruits, eaten raw                                          |
| <i>Fragaria vesca</i> L.              | 2 | 4 | 5  | 21 | 10 | 30 | Fruits              | Fruits, eaten raw and for making jam or desserts           |
|                                       | • | • | •  | •  | •  | 25 | Liqueurs            | Fruits, for making liqueurs                                |
| <i>Malus sylvestris</i> (L.) Mill.    | • | • | •  | 4  | 16 | •  | Fruits              | Fruits, eaten raw as a snack or stored and used as dessert |
|                                       | 2 | • | •  | 14 | 4  | •  | Liqueurs            | Fruits, for making liqueurs or cider                       |
| <i>Mespilus germanica</i> L.          | - | - | •  | 4  | 5  | -  | Fruits              | Fruits, eaten raw after stored                             |
|                                       | - | - | 1  | •  | •  | -  | Liqueurs            | Fruits, for making liqueurs                                |
| <i>Prunus avium</i> L.                | 4 | 7 | 1  | 21 | 3  | 37 | Fruits              | Fruits, eaten raw as dessert and for making jam            |
|                                       | • | • | •  | 3  | •  | 2  | Liqueurs            | Fruits, for making liqueurs                                |

|                                                          |   |   |    |    |    |    |             |                                                 |
|----------------------------------------------------------|---|---|----|----|----|----|-------------|-------------------------------------------------|
| <i>Prunus cerasus</i> L.                                 | • | • | •  | •  | •  | 11 | Fruits      | Fruits, for making jams                         |
|                                                          | 2 | 3 | 12 | 4  | 5  | 7  | Liqueurs    | Fruits, for making liqueurs                     |
| <i>Prunus insititia</i> L.                               | - | - | •  | 2  | 7  | -  | Fruits      | Fruits, eaten raw                               |
|                                                          | - | - | •  | •  | 4  | -  | Liqueurs    | Fruits, for making liqueurs                     |
| <i>Prunus spinosa</i> L.                                 | • | • | 6  | 17 | 16 | •  | Fruits      | Fruits, eaten raw after stored                  |
|                                                          | 9 | 8 | 9  | 21 | 14 | 6  | Liqueurs    | Fruits, for making liqueurs                     |
| <i>Pyrus cordata</i> Desv.                               | • | • | 4  | 7  | 5  | •  | Fruits      | Fruits, eaten raw after stored                  |
|                                                          | • | • | •  | •  | 1  | •  | Liqueurs    | Fruits, for making liqueurs                     |
| <i>Rosa canina</i> L.                                    | • | • | 4  | 4  | 11 | •  | Vegetables  | Young shoots, raw as a snack                    |
|                                                          | 6 | • | •  | 10 | 18 | 3  | Fruits      | Fruits, eaten raw                               |
|                                                          | • | • | •  | 1  | 1  | •  | Liqueurs    | Fruits, for making liqueurs                     |
| <i>Rubus idaeus</i> L.                                   | 2 | • | •  | 7  | 1  | 9  | Fruits      | Fruits, eaten raw as dessert                    |
|                                                          | 2 | • | •  | •  | •  | 9  | Liqueurs    | Fruits, for making liqueurs                     |
| <i>Rubus ulmifolius</i> Schott                           | • | • | 5  | 6  | 14 | •  | Vegetables  | Young shoots, raw as a snack                    |
|                                                          | 4 | 9 | 7  | 29 | 16 | 27 | Fruits      | Fruits, eaten raw as dessert or for making jams |
|                                                          | • | • | 2  | 4  | 1  | 6  | Liqueurs    | Fruits, for making liqueurs or other beverages  |
| <i>Sorbus aria</i> (L.) Crantz                           | • | • | 3  | 27 | 14 | -  | Fruits      | Fruits, eaten raw (sometimes as dessert)        |
| <i>Sorbus aucuparia</i> L.                               | • | • | -  | 2  | •  | •  | Fruits      | Fruits, eaten raw                               |
| <i>Sorbus intermedia</i> (Ehrh.) Pers.                   | • | - | -  | 3  | -  | -  | Fruits      | Fruits, eaten raw                               |
| <i>Sorbus torminalis</i> (L.) Crantz                     | • | • | •  | 4  | •  | •  | Fruits      | Fruits, eaten raw                               |
| SCROPHULARIACEAE                                         |   |   |    |    |    |    |             |                                                 |
| <i>Pedicularis schizocalyx</i> (Lange) Steinger          | • | - | •  | -  | 11 | -  | Flowers     | Flowers sucked                                  |
| TAXACEAE                                                 |   |   |    |    |    |    |             |                                                 |
| <i>Taxus baccata</i> L.                                  | • | • | 3  | 3  | •  | •  | Fruits      | The aril of the seed, eaten raw                 |
| TILIACEAE                                                |   |   |    |    |    |    |             |                                                 |
| <i>Tilia platyphyllos</i> Scop., <i>T. cordata</i> Mill. | - | - | 1  | •  | -  | 28 | Herbal teas | Flowers, as herbal tea                          |
| ULMACEAE                                                 |   |   |    |    |    |    |             |                                                 |
| <i>Ulmus minor</i> Mill.                                 | 7 | • | •  | •  | •  | •  | Vegetables  | immature fruits, raw as a snack                 |
| URTICACEAE                                               |   |   |    |    |    |    |             |                                                 |
| <i>Urtica dioica</i> L.                                  | • | • | 4  | 3  | 3  | 21 | Vegetables  | Tender leaves and stems, stewed                 |
| <i>Urtica membranacea</i> Poir.                          | - | - | •  | -  | -  | 12 | Vegetables  | Tender leaves and stems, stewed                 |
| VALERIANACEAE                                            |   |   |    |    |    |    |             |                                                 |
| <i>Valerianella carinata</i> Loisel.                     | • | - | •  | -  | 2  | -  | Vegetables  | Basal leaves, raw in salads                     |
